# Supplementary material
Source: publisher figshare collection journal article supplement (https://acs.figshare.com/ndownloader/files/3789337)
Supplement: Supplementary file 1 [file 3789337]

# Supporting Information

## Synthesis, Characterization and Antifungal Activities of Amphiphilic Derivatives of Diethylaminoethyl-Chitosan Against *Aspergillus flavus*

Juliana dos Santos Gabriel<sup>1</sup>, Marcio José Tiera<sup>1</sup> and Vera Aparecida de Oliveira Tiera<sup>1\*</sup>

<sup>1</sup>Department of Chemistry and Environmental Sciences, IBILCE, São Paulo State University – UNESP, São José do Rio Preto, São Paulo, Brazil.

\*Corresponding author: Dr. Vera Aparecida de Oliveira Tiera

**E-mail:** verapoli@ibilce.unesp.br

**Tel.:** +55 17 32212358

**Fax:** +55 17 32248692

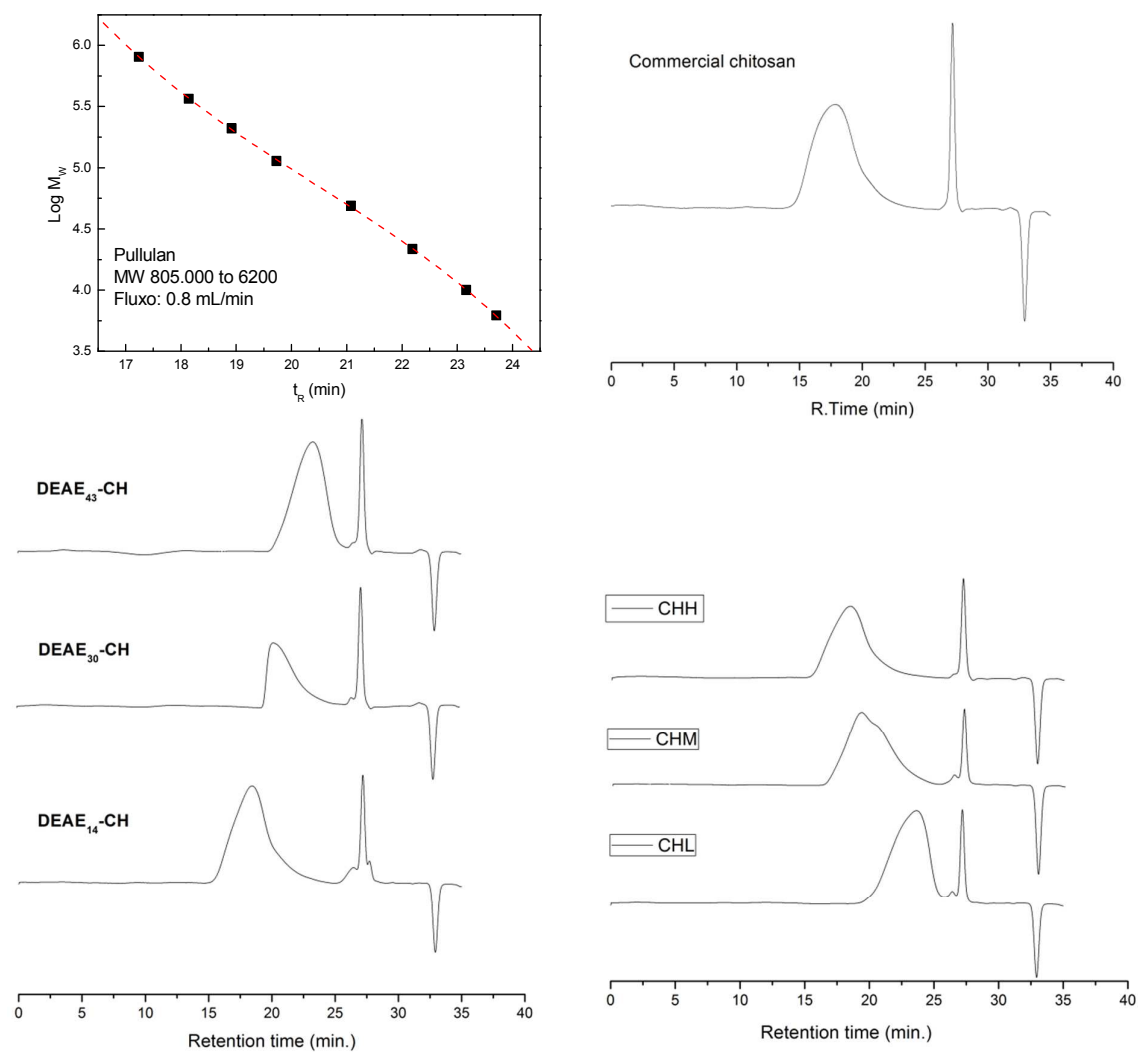

**Figure S1.** Calibration curve and gel permeation chromatograms of commercial chitosan, DEAE<sub>43</sub>, DEAE<sub>30</sub> and DEAE<sub>14</sub> and their parent deacetylated chitosans of high, medium and low molecular weights (CH<sub>H</sub>, CH<sub>M</sub>, CH<sub>L</sub> respectively).

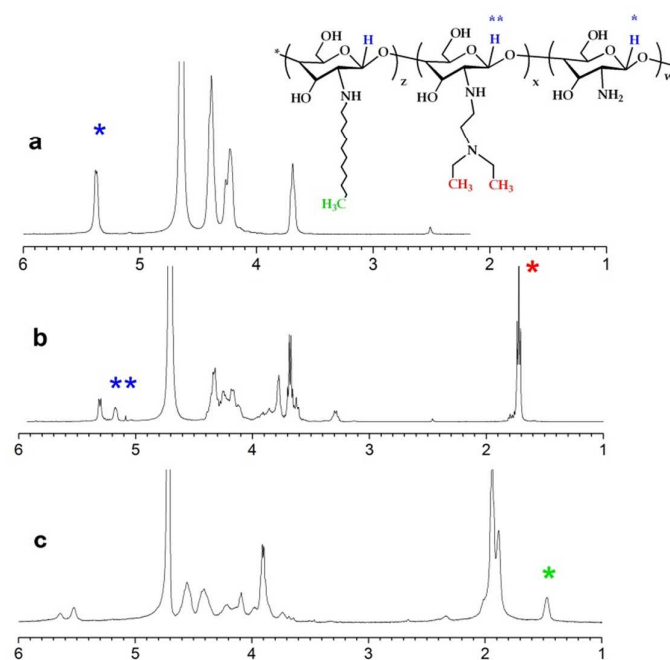

**Figure S2.**  $^1\text{H}$  NMR spectra of the following amphiphilic derivatives of diethylaminoethyl chitosan in  $\text{D}_2\text{O}/\text{DCI}$  at  $70^\circ\text{C}$ : **a)**  $\text{CH}_\text{H}$ ; **b)**  $\text{DEAE}_{43}$  and **c)**  $\text{DEAE}_{43}\text{-CH-Dod}_{30}$ . The colors indicate the signals used to determine the degrees of substitution for DEAE and dodecyl.

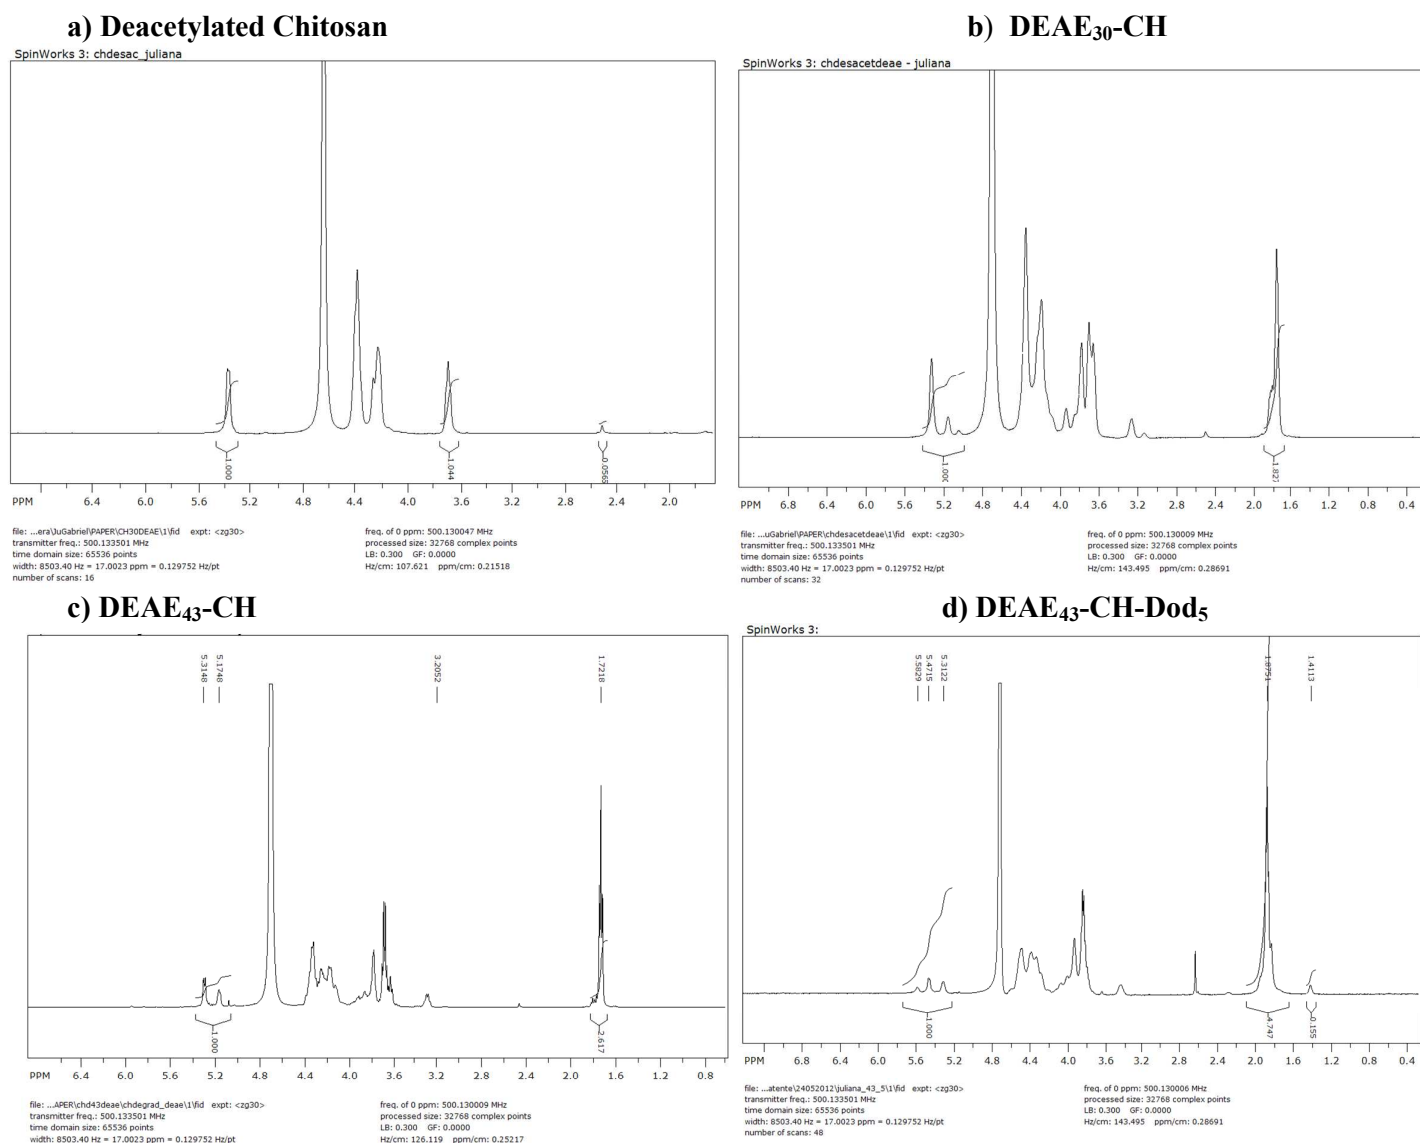

**Figure S3.**  $^1\text{H}$  NMR spectra of the following amphiphilic derivatives of diethylaminoethyl chitosan in  $\text{D}_2\text{O}/\text{DCI}$  at  $70^\circ\text{C}$ : **a)** Deacetylated chitosan; **b)** DEAE<sub>30</sub>-CH and **c)** DEAE<sub>43</sub>-CH, **d)** DEAE<sub>43</sub>-CH-Dod<sub>5</sub> .

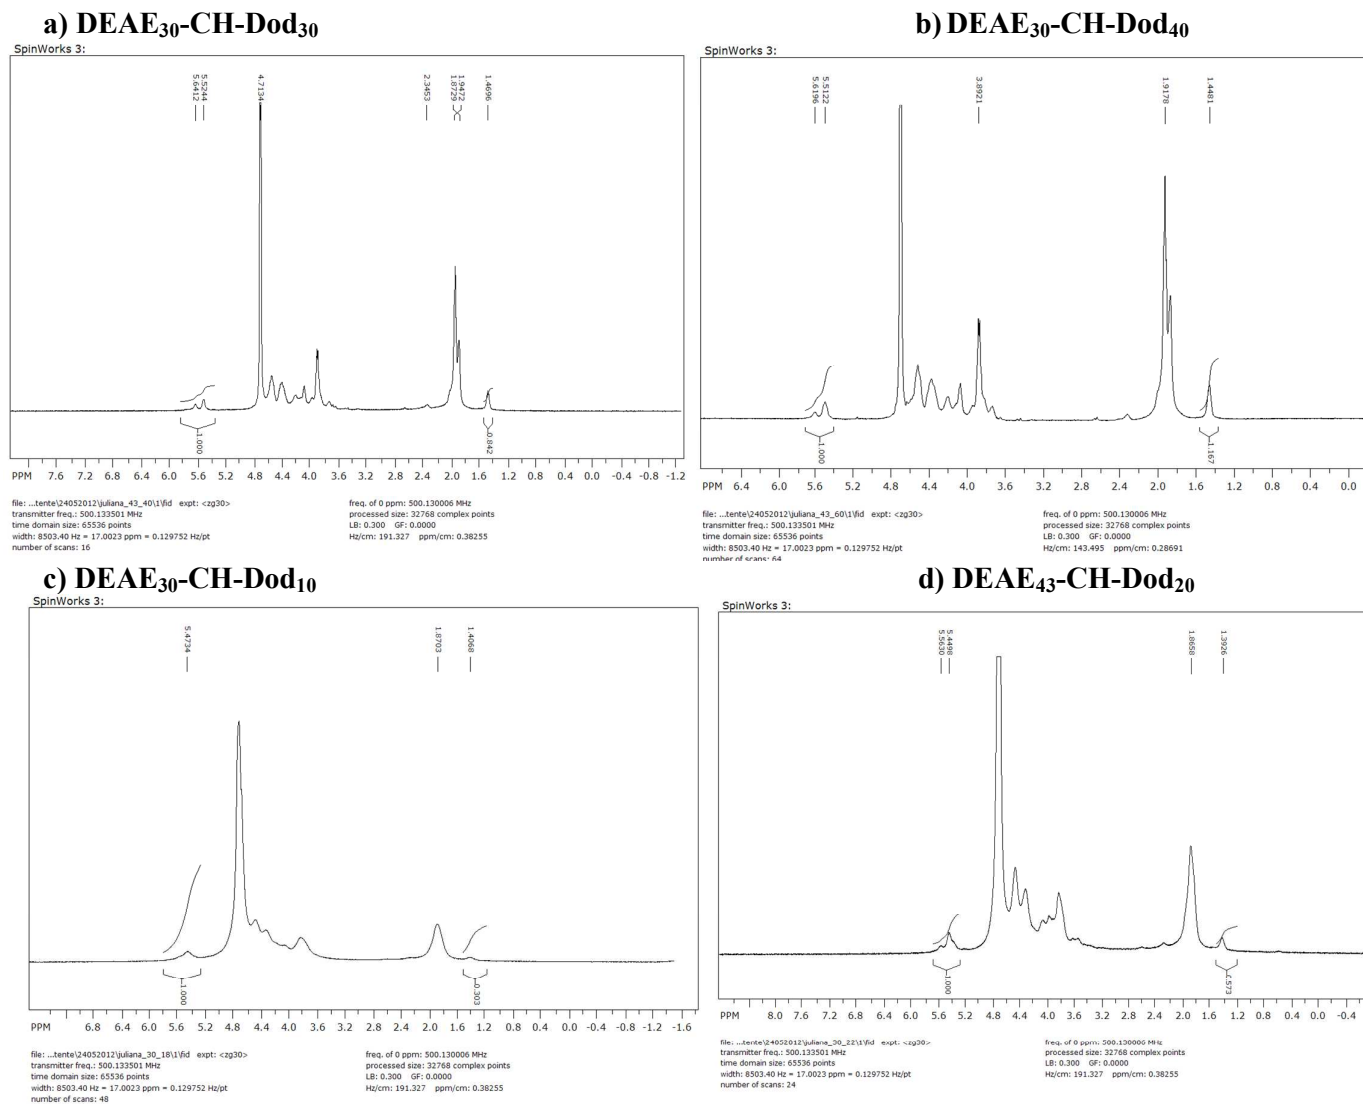

**Figure S4.**  $^1\text{H}$  NMR spectra of the following amphiphilic derivatives of diethylaminoethyl chitosan in  $\text{D}_2\text{O}/\text{DCl}$  at  $70^\circ\text{C}$ : **a)** DEAE<sub>43</sub>-CH-Dod<sub>30</sub>; **b)** DEAE<sub>43</sub>-CH-Dod<sub>40</sub> and **c)** DEAE<sub>30</sub>-CH-Dod<sub>10</sub>, **d)** DEAE<sub>30</sub>-CH-Dod<sub>20</sub>

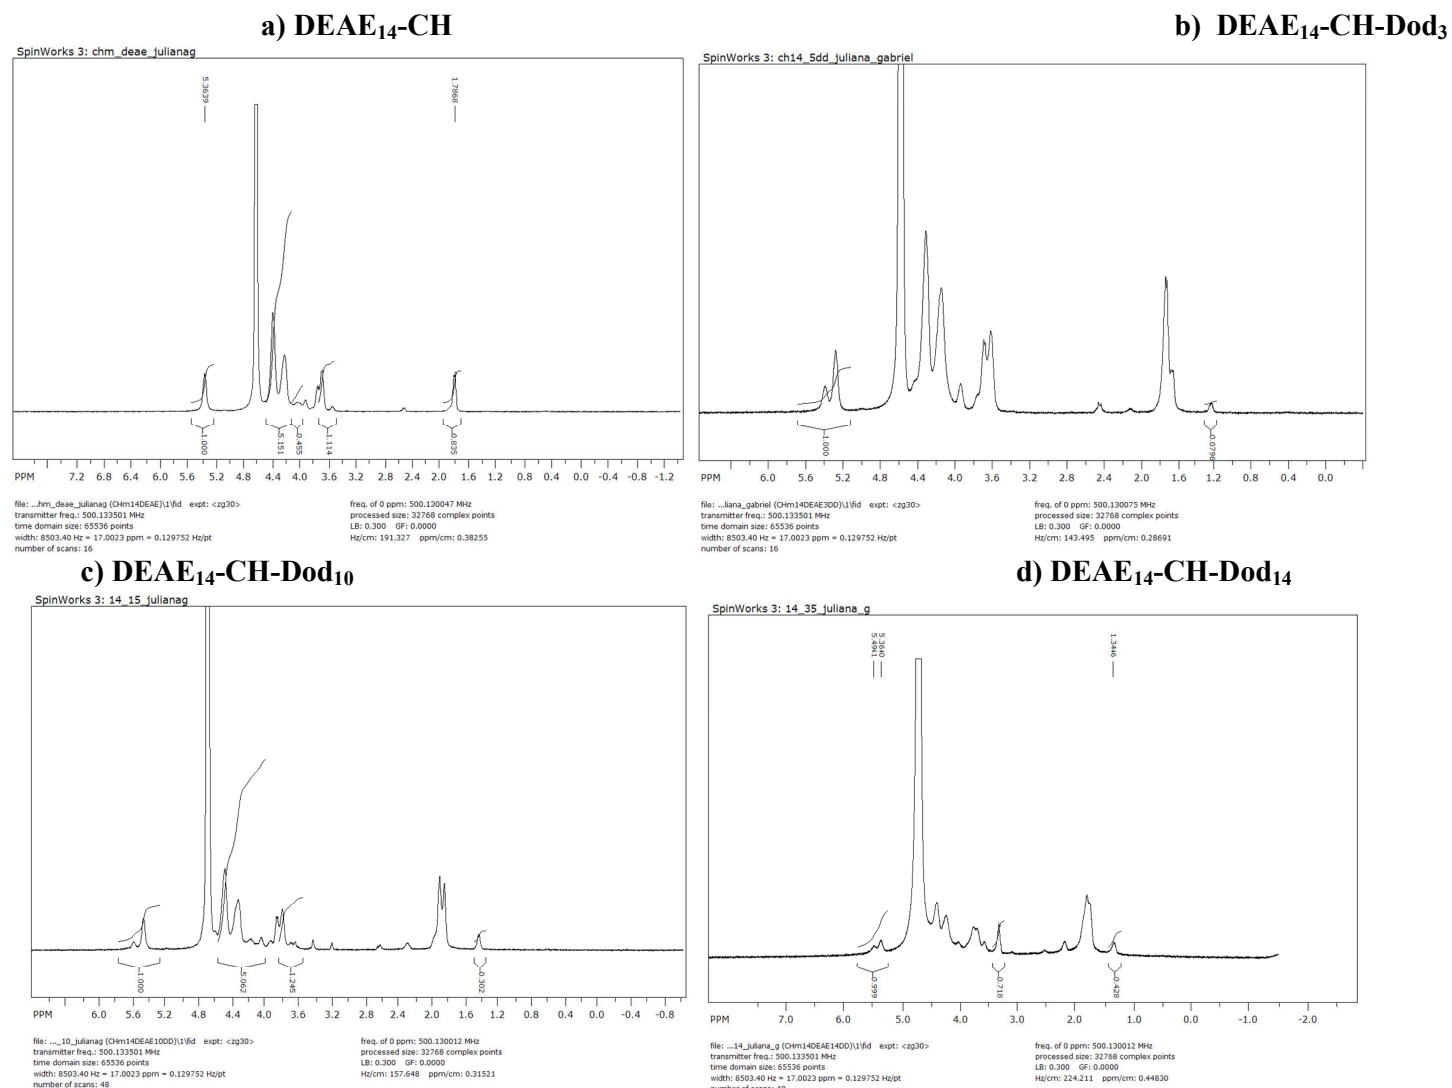

**Figure S5.** <sup>1</sup>H NMR spectra of the following amphiphilic derivatives of diethylaminoethyl chitosan in D<sub>2</sub>O/DCl at 70°C: **a)** DEAE<sub>14</sub>-CH ; **b)** DEAE<sub>14</sub>-CH-Dod<sub>3</sub> ; **c)** DEAE<sub>14</sub>-CH-Dod<sub>10</sub> and **d)** DEAE<sub>14</sub>-CH-Dod<sub>14</sub>

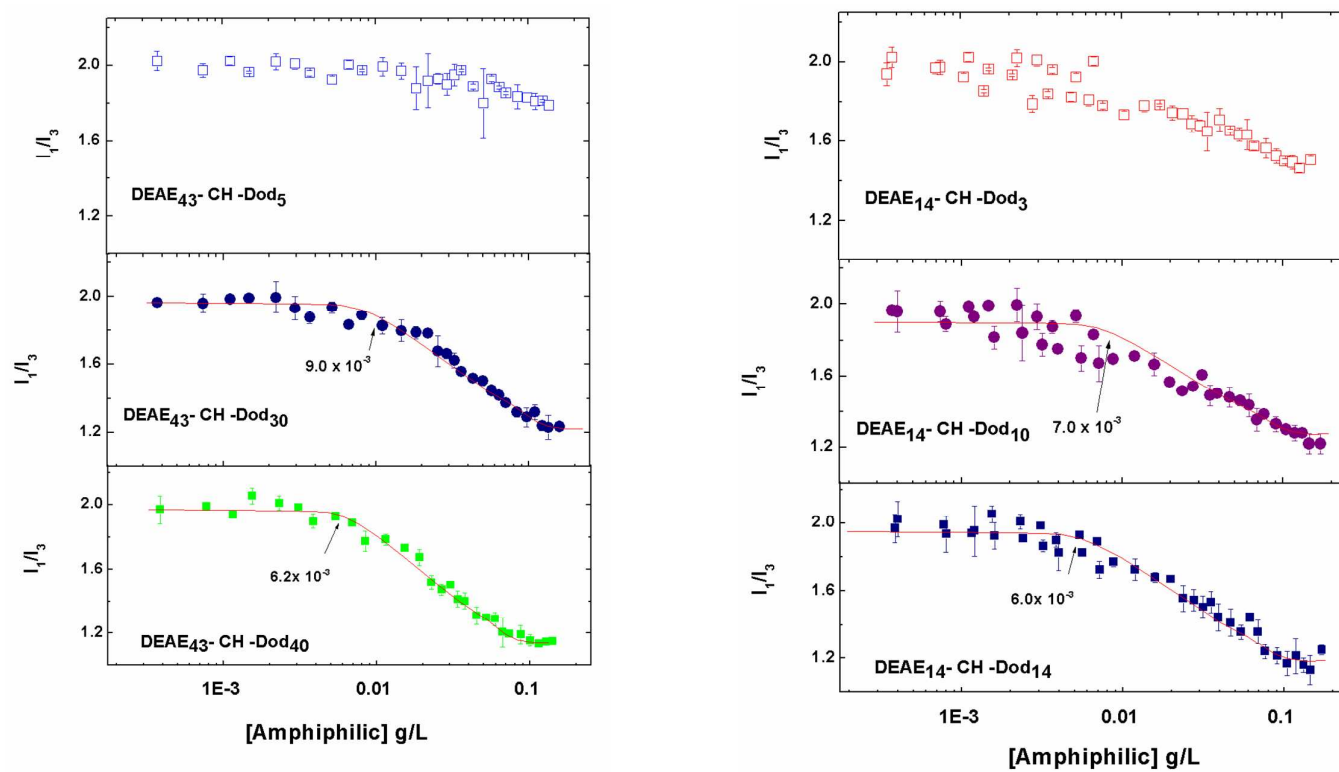

**Figure S6.**  $I_1/I_3$  ratios vs. DEAE<sub>43</sub>-CH- Dod<sub>x</sub> and DEAE<sub>14</sub>-CH- Dod<sub>x</sub> concentration at pH 5.0.

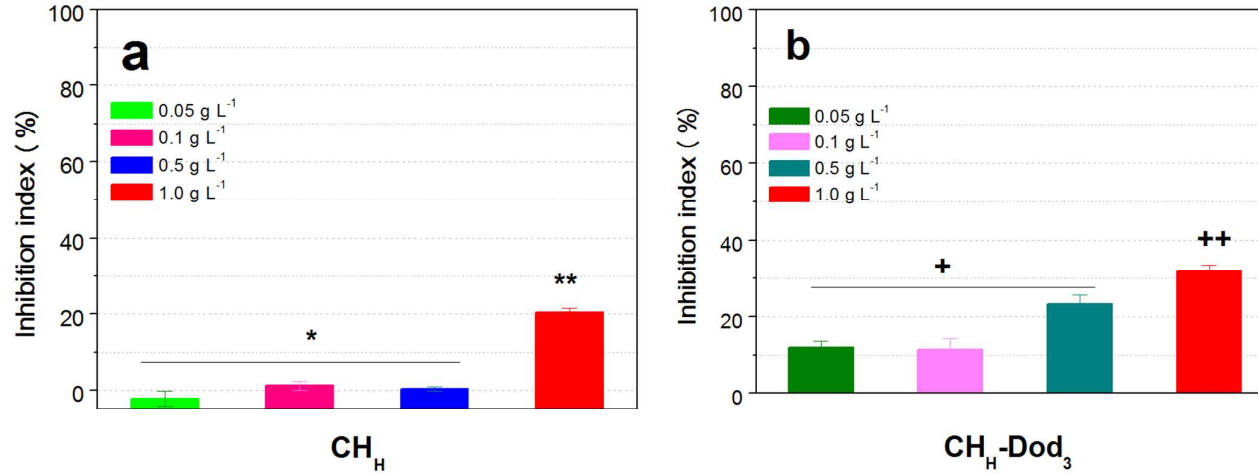

**Figure S7.** Inhibition of the *in vitro* growth of *A. parasiticus* in the presence of various concentrations of (a)  $CH_H$  and  $CH_H$ -Dod<sub>3</sub>. Vertical bars with different symbols at the same concentration are significantly different according to the Kruskal-Wallis test ( $P < 0.05$ ).



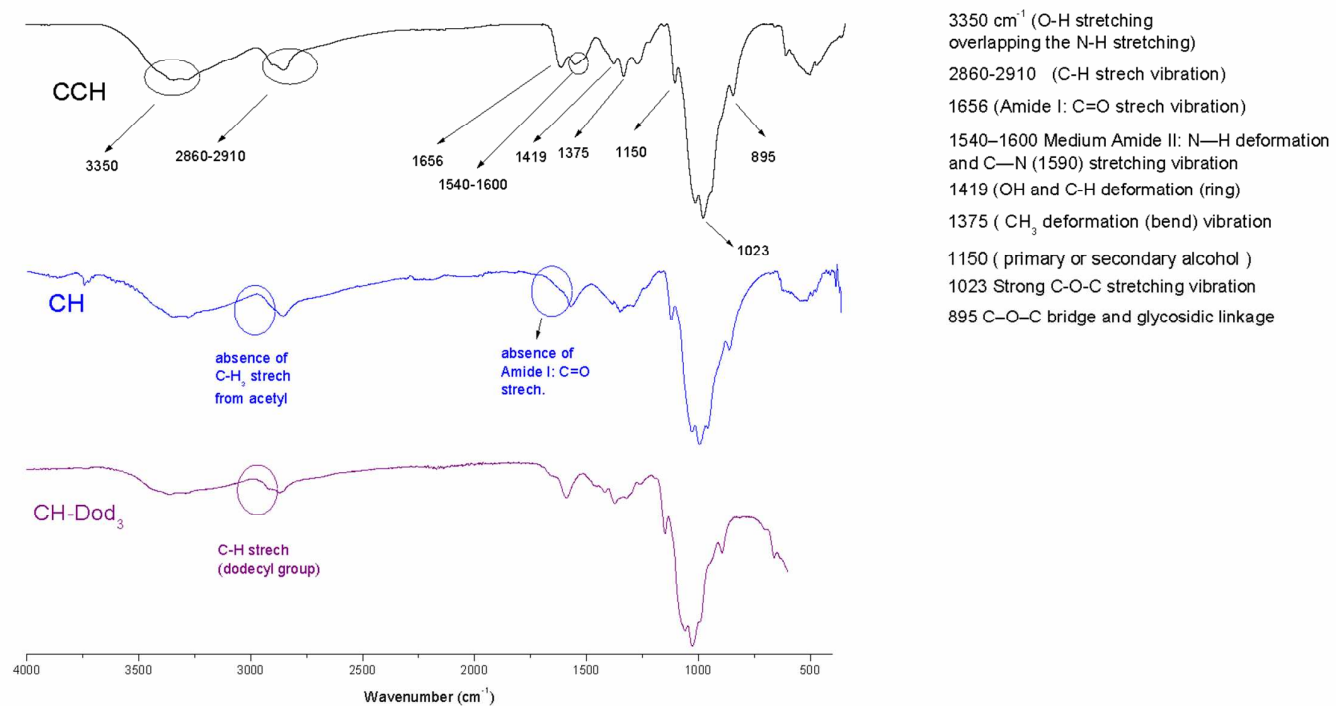

**Figure S8.** IR spectra of commercial (CCH), deacetylated (CH) and dodecylated chitosans.

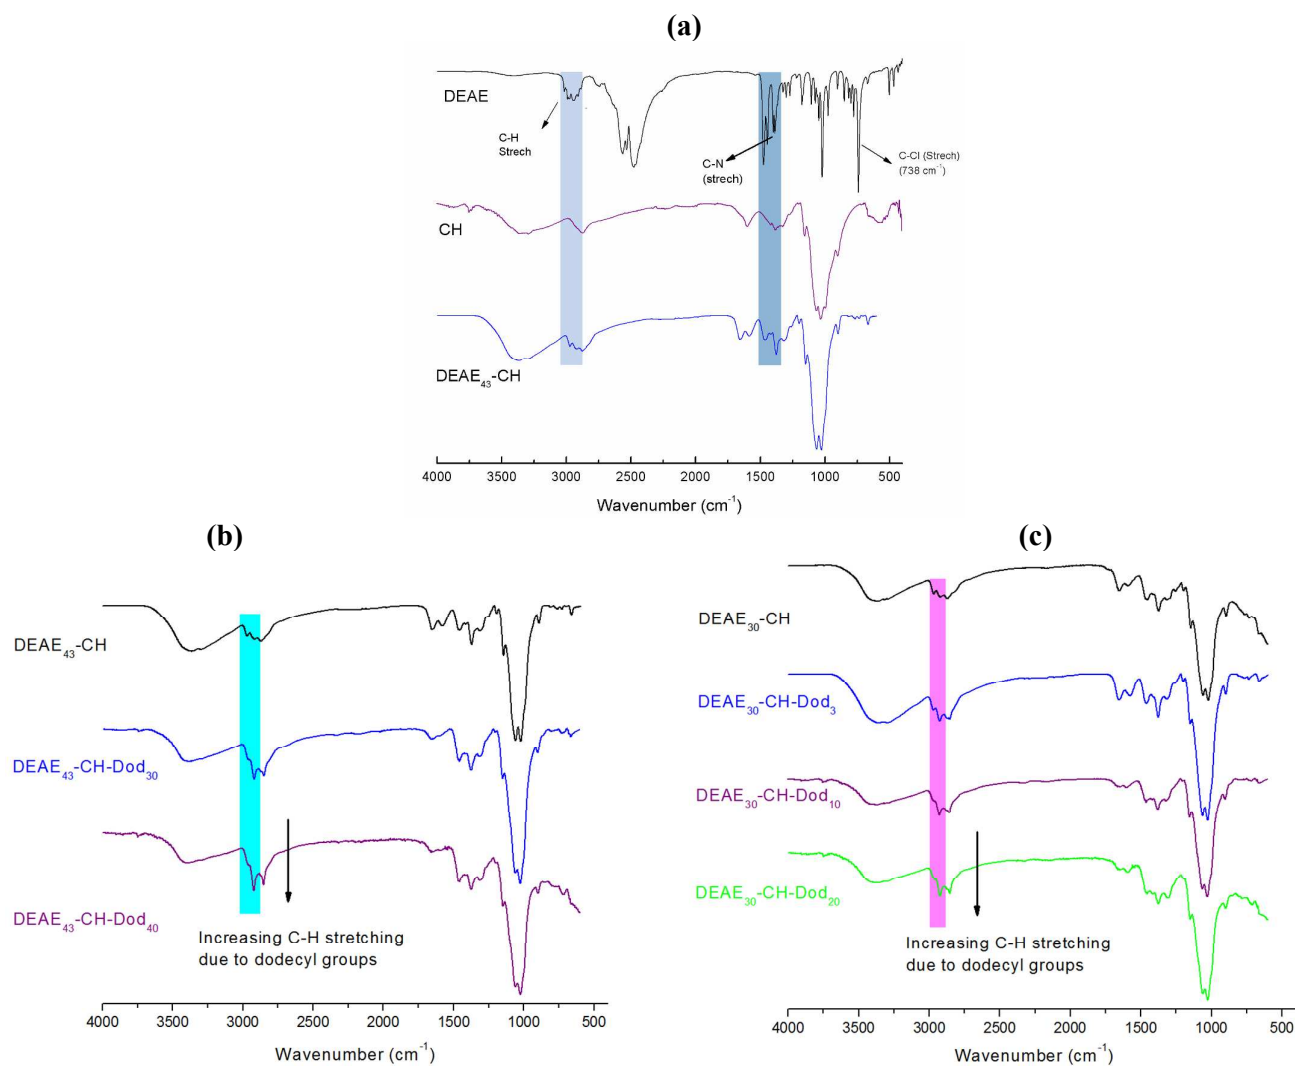

**Figure S9.** (a) IR spectra of DEAE, deacetylated chitosan (CH) and DEAE<sub>43</sub>-CH derivative; (b) IR spectra of the following amphiphilic derivatives of diethylaminoethyl chitosan DEAE<sub>43</sub>-CH, DEAE<sub>43</sub>-CH-Dod<sub>30</sub> and DEAE<sub>43</sub>-CH-Dod<sub>40</sub> ; (c) IR spectra of the following amphiphilic derivatives of diethylaminoethyl chitosan DEAE<sub>30</sub>-CH, DEAE<sub>30</sub>-CH-Dod<sub>3</sub>, DEAE<sub>30</sub>-CH-Dod<sub>10</sub> and DEAE<sub>30</sub>-CH-Dod<sub>20</sub>
